# Supplementary material for: An Unexpected Enzyme in Vascular Smooth Muscle Cells: Angiotensin II Upregulates Cholesterol-25-Hydroxylase Gene Expression
Source: MDPI journal article supplement (doi:10.3390/ijms24043968), 2023-02-16
Supplement: s1 [file s1]

## Supplementary Material

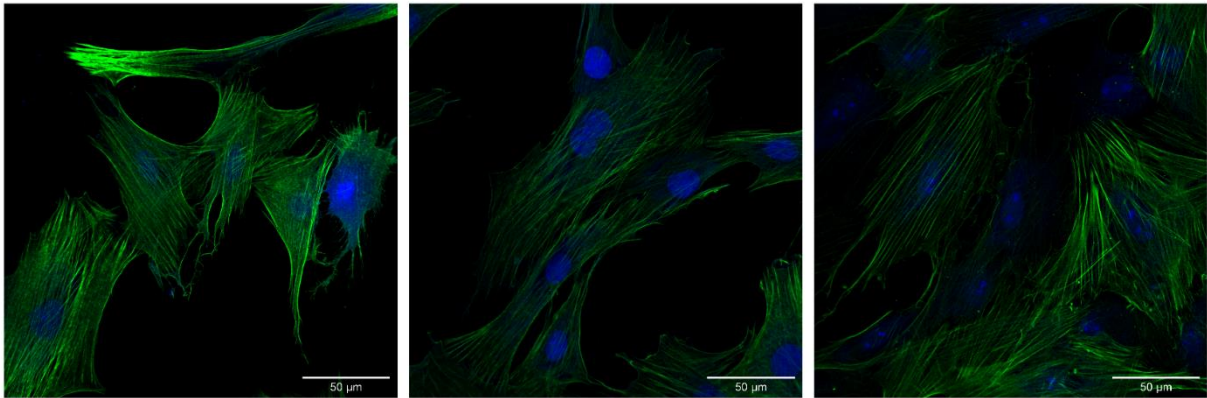

**Supplementary Figure S1.** Verification of primary rat VSMC culture homogeneity. Primary rat VSMCs were fixed with 4% PFA solution, and permeabilized with 0.1% Triton-X solution. Smooth muscle alpha actin (green) was labeled with monoclonal mouse antibody. Cell nuclei (blue) were stained with TO-PRO3 nucleic acid stain. VSMCs were imaged with Zeiss LSM 710 confocal laser-scanning microscope. Fiji software was used for image processing. Scale bars represent 50  $\mu\text{m}$ .

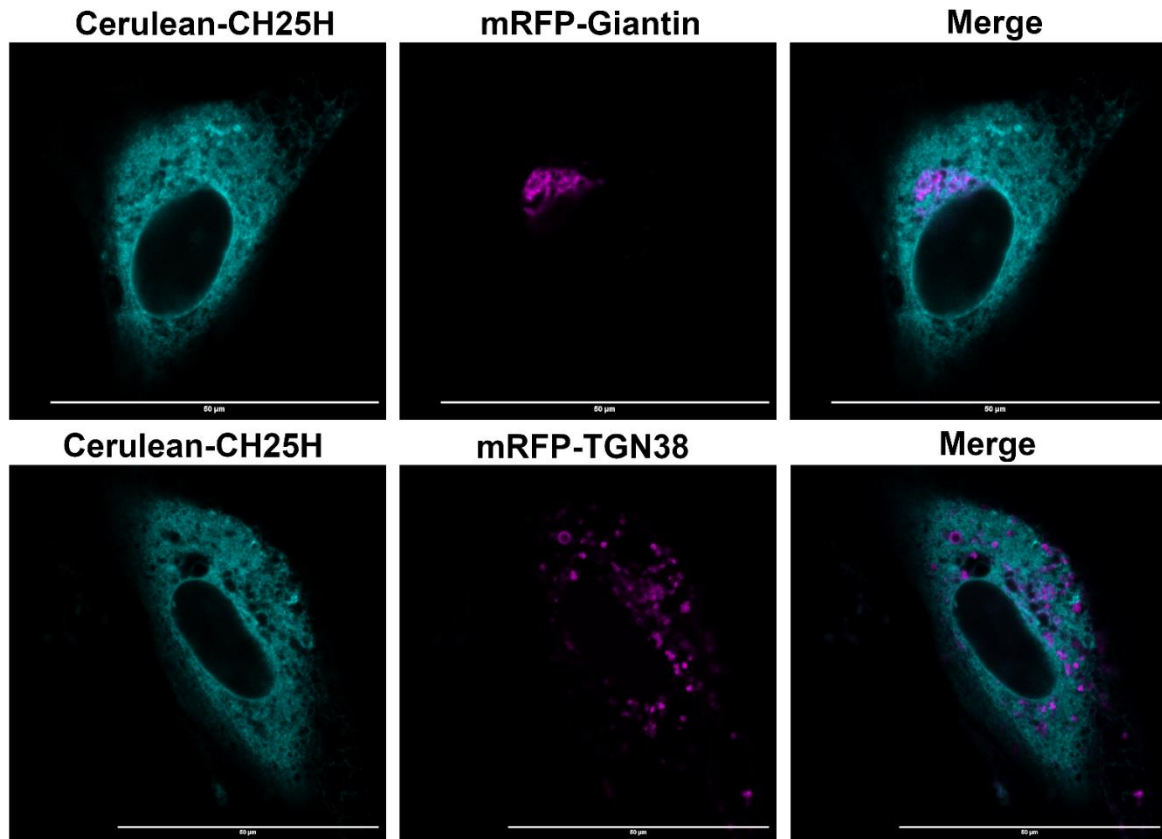

**Supplementary Figure S2.** CH25H does not show colocalization with Golgi markers. A7R5 cells were cotransfected with DNA constructs encoding Cerulean-CH25H (cyan) and mRFP-Giantin - marker of Golgi apparatus membrane - or mRFP-TGN38 - marker of trans-Golgi network membrane - (magenta) fusion protein. 24 hours post-transfection, cells were examined using Zeiss LSM710 confocal laser-scanning microscope. Merged images and colocalization analysis of signals show no colocalization of either Golgi marker protein and CH25H. Pearson's correlation coefficient in case of Cerulean-CH25H and mRFP-Giantin signals:  $0.29 \pm 0.014 = \text{mean} \pm \text{SEM}$  and in case of Cerulean-CH25H and mRFP-TGN38:  $0.41 \pm 0.013 = \text{mean} \pm \text{SEM}$ ,  $n = 3$  independent experiments. Fiji software was used for image processing and colocalization analysis. Scale bars represent 50  $\mu\text{m}$ .
